# Supplementary material for: Altered mouse cecal microbiome-serum enterolignans relationships in response to dietary lignans ingested through whole flaxseed or flaxseed hull
Source: Royal Society of Chemistry journal article supplement (doi:10.1039/d5fo03558a), 2025-11-18
Supplement: d5fo03558a6.xlsx [file d5fo03558a6.xlsx]

## Sheet: BD-SCFA
Table S3. Significant Taxa - SCFA Correlations in Basal Diet
Taxon	SCFA	value	pvalue	qvalue
Genus:Anaerotruncus	PA (umol/g dry feces))	0.742528	0.034855	0.724985
Genus:Carnobacterium	VA (umol/g dry feces)	-0.850315	0.00747142	1
Genus:Carnobacterium	BA (umol/g dry feces)	-0.738095	0.0365528	0.712779
Genus:Leuconostoc	VA (umol/g dry feces)	-0.944228	0.000415763	0.259436
Genus:Leuconostoc	PA (umol/g dry feces))	-0.79111	0.0193665	0.863191
Genus:Leuconostoc	BA (umol/g dry feces)	-0.786387	0.020631	0.75728
Genus:Leuconostoc	AA (umol/g dry feces)	-0.786387	0.020631	0.75728
Genus:Leuconostoc	total SCFA (umol/g dry feces)	-0.786387	0.020631	0.75728
Genus:Romboutsia	total SCFA (umol/g dry feces)	-0.738095	0.0365528	0.712779
Genus:Romboutsia	AA (umol/g dry feces)	-0.714286	0.0465282	0.764043
Order:Clostridiales	PA (umol/g dry feces))	0.742528	0.034855	0.724985
PA, propionic acid
VA, valeric acid
BA, butyric acid
AA, acetic acid

## Sheet: FH-SCFA
Table S3. Significant Taxa - SCFA Correlations in FH Diet
Taxon	SCFA	value	pvalue	qvalue
Species:Bacteroides_dorei	BA (umol/g dry feces)	-0.904762	0.00200828	1
Species:Bacteroides_dorei	AA (umol/g dry feces)	-0.880952	0.00385032	0.790599
Species:Bacteroides_dorei	total SCFA (umol/g dry feces)	-0.880952	0.00385032	0.790599
Class:Clostridia	PA (umol/g dry feces))	-0.857143	0.00653002	0.804498
Species:Clostridium_lactatifermentans	BA (umol/g dry feces)	0.833333	0.0101755	0.895448
Species:Paraprevotella_clara	BA (umol/g dry feces)	0.833333	0.0101755	0.895448
Species:Bacteroides_dorei	VA (umol/g dry feces)	-0.809524	0.0149027	1
Order:Clostridiales	PA (umol/g dry feces))	0.738095	0.0365528	1
Species:Eubacterium_coprostanoligenes	AA (umol/g dry feces)	0.714286	0.0465282	1
Family:Erysipelotrichaceae	PA (umol/g dry feces))	-0.714286	0.0465282	1
Species:Eubacterium_coprostanoligenes	total SCFA (umol/g dry feces)	0.714286	0.0465282	1
PA, propionic acid
VA, valeric acid
BA, butyric acid
AA, acetic acid

## Sheet: FS-SCFA
Table S3. Significant Taxa - SCFAs Correlations in FS Diet
Taxon	SCFA	value	pvalue	qvalue
Species:Lactobacillus_intestinalis	AA (umol/g dry feces)	0.913223	0.00152914	0.235487
Species:Lactobacillus_intestinalis	BA (umol/g dry feces)	0.913223	0.00152914	0.235487
Species:Lactobacillus_intestinalis	total SCFA (umol/g dry feces)	0.913223	0.00152914	0.235487
Species:Lactobacillus_intestinalis	VA (umol/g dry feces)	0.913223	0.00152914	0.235487
Species:Eubacterium_coprostanoligenes	AA (umol/g dry feces)	-0.904762	0.00200828	0.176728
Species:Eubacterium_coprostanoligenes	BA (umol/g dry feces)	-0.904762	0.00200828	0.176728
Species:Eubacterium_coprostanoligenes	total SCFA (umol/g dry feces)	-0.904762	0.00200828	0.176728
Genus:Clostridium_XlVb	AA (umol/g dry feces)	0.809524	0.0149027	0.655717
Genus:Clostridium_XlVb	BA (umol/g dry feces)	0.809524	0.0149027	0.655717
Genus:Clostridium_XlVb	total SCFA (umol/g dry feces)	0.809524	0.0149027	0.655717
Species:Clostridium_methylpentosum	PA (umol/g dry feces))	-0.785714	0.0208151	0.754242
Species:Eubacterium_coprostanoligenes	VA (umol/g dry feces)	-0.785714	0.0208151	0.754242
Species:Bacteroides_xylanisolvens	PA (umol/g dry feces))	-0.738095	0.0365528	0.938188
Genus:Alistipes	PA (umol/g dry feces))	0.738095	0.0365528	0.938188
Genus:Bacillus	VA (umol/g dry feces)	0.738095	0.0365528	0.938188
Species:Lactobacillus_intestinalis	PA (umol/g dry feces))	0.735652	0.0375095	0.924235
Species:Bacteroides_xylanisolvens	AA (umol/g dry feces)	-0.714286	0.0465282	0.818897
Genus:Lactobacillus	AA (umol/g dry feces)	0.714286	0.0465282	0.818897
Species:Bacteroides_xylanisolvens	BA (umol/g dry feces)	-0.714286	0.0465282	0.818897
Genus:Lactobacillus	BA (umol/g dry feces)	0.714286	0.0465282	0.818897
Phylum:Actinobacteria	PA (umol/g dry feces))	-0.714286	0.0465282	0.818897
Species:Eubacterium_coprostanoligenes	PA (umol/g dry feces))	-0.714286	0.0465282	0.818897
Species:Bacteroides_xylanisolvens	total SCFA (umol/g dry feces)	-0.714286	0.0465282	0.818897
Genus:Lactobacillus	total SCFA (umol/g dry feces)	0.714286	0.0465282	0.818897
Genus:Alistipes	VA (umol/g dry feces)	0.714286	0.0465282	0.818897
PA, propionic acid
VA, valeric acid
BA, butyric acid
AA, acetic acid

## Sheet: FH-Lignans
Table S3. Significant Taxa - Lignan Correlations in FH Diet
Taxon	Lignan	value	pvalue	qvalue
Genus:Bacteroides	Secoisolariciresinol uM	0.766481	0.02652	0.544544
Species:Bacteroides_nordii	Enterolactone uM	0.761905	0.0280049	0.479196
Species:Bacteroides_xylanisolvens	Secoisolariciresinol uM	0.874267	0.00451239	0.231636
Species:Alistipes_finegoldii	Enterodiol uM	0.714286	0.0465282	0.573228
Species:Alistipes_shahii	Enterolactone uM	0.904762	0.00200828	0.206183
Genus:Streptophyta	Enterolactone uM	-0.756323	0.0298844	0.484442
Genus:Carnobacterium	Secoisolariciresinol uM	-0.752669	0.0311553	0.479792
Species:Lactococcus_raffinolactis	Enterolactone uM	0.875172	0.00441876	0.272196
Species:Streptococcus_agalactiae	Secoisolariciresinol uM	0.79111	0.0193665	0.596487
Genus:Clostridium_sensu_stricto	Enterolactone uM	-0.904762	0.00200828	0.206183
Family:Lachnospiraceae	Total Lignan	-0.809524	0.0149027	0.510002
Family:Lachnospiraceae	Secoisolariciresinol uM	-0.790433	0.0195445	0.547247
Family:Lachnospiraceae	Enterodiol uM	-0.785714	0.0208151	0.493158
Species:Acetatifactor_muris	Enterolactone uM	0.761905	0.0280049	0.479196
Genus:Clostridium_XlVb	Enterolactone uM	-0.761905	0.0280049	0.479196
Genus:Eisenbergiella	Enterolactone uM	0.785714	0.0208151	0.493158
Genus:Romboutsia	Enterolactone uM	-0.809524	0.0149027	0.510002
Family:Ruminococcaceae	Total Lignan	0.714286	0.0465282	0.573228
Genus:Anaerotruncus	Enterodiol uM	-0.904762	0.00200828	0.206183
Genus:Anaerotruncus	Total Lignan	-0.880952	0.00385032	0.296475
Species:Clostridium_viride	Secoisolariciresinol uM	0.766481	0.02652	0.544544
Genus:Flavonifractor	Total Lignan	0.833333	0.0101755	0.447724
Genus:Flavonifractor	Enterodiol uM	0.738095	0.0365528	0.511739
Genus:Oscillibacter	Enterodiol uM	0.738095	0.0365528	0.511739
Genus:Oscillibacter	Total Lignan	0.714286	0.0465282	0.573228

## Sheet: FS-Lignans
Table S3. Significant Taxa - Lignan Correlations in FS Diet
Taxon	Lignan	value	pvalue	qvalue
Species:Alistipes_finegoldii	Secoisolariciresinol uM	0.902708	0.00213765	0.658395
Species:Lactococcus_chungangensis	Enterolactone uM	0.89822	0.0024388	0.375575
Species:Lactococcus_chungangensis	Total Lignan	0.862291	0.00587299	0.60296
Species:Oscillibacter_valericigenes	Enterolactone uM	0.857143	0.00653002	0.502811
Class:Alphaproteobacteria	Enterolactone uM	0.785714	0.0208151	1
Species:Oscillibacter_valericigenes	Total Lignan	0.785714	0.0208151	1
Species:Streptococcus_agalactiae	Secoisolariciresinol uM	0.775	0.0238874	1
Class:Alphaproteobacteria	Total Lignan	0.761905	0.0280049	1
Species:Paraprevotella_clara	Enterodiol uM	0.714286	0.0465282	1
Family:Lachnospiraceae	Secoisolariciresinol uM	-0.707528	0.0496283	1
