# Supplementary material for: Altered mouse cecal microbiome-serum enterolignans relationships in response to dietary lignans ingested through whole flaxseed or flaxseed hull
Source: Royal Society of Chemistry journal article supplement (doi:10.1039/d5fo03558a), 2025-11-18
Supplement: d5fo03558a7.xlsx [file d5fo03558a7.xlsx]

## Sheet: Sheet 1
Table S4. Cecal microbial pathways abundance (PICRUSt2)
	Baseline mean value for BD Diet	Standard error of the intercept estimate	T-statistic for the intercept	P-value for the intercept	Effect size of BD Diet relative to the FS Diet	Standard error of the BD effect estimate	T-statistic for the BD effect	Unadjusted p-value for BD effect	Effect size of FH Diet relative to the FS Diet	Standard error of the FH effect estimate	T-statistic for the FH effect	Unadjusted p-value for FH effect	Adjusted p-value for intercept	Adjusted p-value for BD Diet	Adjusted p-value for FH Diet
Microbial Pathways	X.Intercept..Estimate	X.Intercept..Std..Error	X.Intercept..t.value	X.Intercept..Pr...t..	model.dietBD.Estimate	model.dietBD.Std..Error	model.dietBD.t.value	model.dietBD.Pr...t..	model.dietFH.Estimate	model.dietFH.Std..Error	model.dietFH.t.value	model.dietFH.Pr...t..	X.Intercept..Pr...t...BH	model.dietBD.Pr...t...BH	model.dietFH.Pr...t...BH
allantoin degradation to glyoxylate III	-0.721889	0.151627	-4.76488	0.000115286	0.485577	0.214433	2.26647	0.0355137	-0.822095	0.214433	-3.8368	0.00103658	0.00643114	1	0.342039
UDP-2,3-diacetamido-2,3-dideoxy-&alpha;-D-mannuronate biosynthesis	-1.34511	0.222653	-6.04588	5.83853e-06	0.537682	0.314879	1.70904	0.103842	-1.07769	0.314879	-3.42447	0.00265165	0.000372196	1	0.820641
S-methyl-5-thio-&alpha;-D-ribose 1-phosphate degradation	-10.5569	0.459218	-23.7024	1.03884e-13	1.68344	0.649432	2.64392	0.0314456	-0.572174	0.649432	-0.914667	0.416711	1.28969e-11	0.932437	0.996269
3-phenylpropanoate degradation	-14.5625	1.18048	-12.833	9.59701e-09	0.387883	1.66946	0.257594	0.519763	1.24067	1.66946	0.798441	0.45394	6.94721e-07	1	0.996439
phenylacetate degradation I (aerobic)	-14.3071	1.11983	-13.4562	1.15239e-08	-0.432794	1.58367	-0.302371	0.504727	-0.796684	1.58367	-0.543576	0.462107	8.27443e-07	0.998573	0.996517
chlorophyllide a biosynthesis II (anaerobic)	-9.01784	0.943563	-10.1731	1.1912e-06	-5.76423	1.3344	-4.50099	0.00202657	-2.85993	1.3344	-2.20407	0.0582732	7.22752e-05	0.25609	0.996685
chlorophyllide a biosynthesis III (aerobic, light independent)	-9.03168	0.946029	-10.2207	2.95544e-06	-5.71817	1.33789	-4.48589	0.00235369	-2.82979	1.33789	-2.17078	0.0624	0.000159006	0.268429	0.997337
chlorophyllide a biosynthesis I (aerobic, light-dependent)	-9.01765	0.939858	-10.2329	2.47138e-06	-5.76917	1.32916	-4.51776	0.0015639	-2.85753	1.32916	-2.21646	0.0600342	0.000132231	0.257796	0.997697
2-nitrobenzoate degradation I	-11.0614	0.45063	-25.2564	7.02932e-14	1.72868	0.637287	2.76944	0.0312685	-0.379343	0.637287	-0.620014	0.483078	8.89907e-12	0.879102	0.997723
superpathway of phenylethylamine degradation	-14.3241	1.12093	-13.4459	3.45147e-08	-0.518723	1.58523	-0.359101	0.469449	-0.725045	1.58523	-0.491537	0.46333	2.20552e-06	0.999348	0.998257
superpathway of L-threonine metabolism	-14.9882	1.09592	-14.3899	7.59112e-09	0.175384	1.54987	0.130183	0.486035	0.360317	1.54987	0.258974	0.504257	5.38895e-07	0.998326	0.998408
L-histidine degradation II	-14.9308	1.0786	-14.5542	1.21805e-09	0.577052	1.52537	0.419039	0.478912	-0.0604483	1.52537	-0.0101742	0.47771	9.97601e-08	0.998479	0.998707
superpathway of menaquinol-8 biosynthesis II	-0.00286065	0.244665	-0.0117229	0.953532	0.253466	0.346008	0.73293	0.472977	-1.08147	0.346008	-3.12667	0.0052137	1	1	0.998833
4-hydroxyphenylacetate degradation	-15.0702	1.11517	-14.1566	1.02305e-08	0.676104	1.57709	0.442863	0.471697	0.0178407	1.57709	0.00954701	0.491527	7.18536e-07	0.998158	0.998869
L-tryptophan degradation XII (Geobacillus)	-10.8885	0.459215	-24.4113	7.13562e-14	1.94624	0.649429	3.06428	0.0151234	-0.443822	0.649429	-0.710053	0.462172	8.358e-12	0.813574	0.998917
reductive acetyl coenzyme A pathway	-0.632891	0.258837	-2.44631	0.0237385	0.231512	0.36605	0.632854	0.534858	-1.13083	0.36605	-3.0904	0.00567534	0.783274	1	0.999113
4-methylcatechol degradation (ortho cleavage)	-13.5301	1.05187	-13.6007	7.63981e-09	-1.14946	1.48757	-0.792645	0.422959	-0.759084	1.48757	-0.506227	0.508637	5.61278e-07	0.99895	0.999219
L-methionine salvage cycle III	-9.75535	0.399536	-24.8378	1.22966e-15	1.64017	0.565029	2.93065	0.0148424	-0.515899	0.565029	-0.940465	0.406753	1.91035e-13	0.887336	0.999228
L-tryptophan degradation to 2-amino-3-carboxymuconate semialdehyde	-11.0576	0.455096	-24.9441	7.39963e-15	1.90938	0.643603	3.03011	0.0189017	-0.390521	0.643603	-0.616594	0.475302	1.02536e-12	0.801172	0.999325
superpathway of salicylate degradation	-13.6269	1.05724	-13.5554	4.03814e-09	-1.25118	1.49517	-0.866496	0.400743	0.585034	1.49517	0.40922	0.52797	3.15496e-07	0.989635	0.999578
superpathway of CDP-glucose-derived O-antigen building blocks biosynthesis	-14.9511	1.09139	-14.3873	9.20341e-09	0.271762	1.54346	0.196661	0.503353	0.384196	1.54346	0.271081	0.504982	6.14701e-07	1	0.999637
1,4-dihydroxy-6-naphthoate biosynthesis II	-1.47483	0.263632	-5.59797	1.59513e-05	0.310996	0.372832	0.834988	0.414821	-1.13865	0.372832	-3.05516	0.00615867	0.000979827	1	0.999737
catechol degradation to 2-oxopent-4-enoate II	-10.4566	0.45034	-23.8709	2.23352e-14	2.05079	0.636877	3.27509	0.00807027	-0.305111	0.636877	-0.516482	0.536548	3.03466e-12	0.738663	0.999764
chondroitin sulfate degradation I (bacterial)	1.75432	0.158157	11.0988	3.37722e-10	-1.78278	0.223668	-7.97528	9.549e-08	0.327132	0.223668	1.46344	0.160579	3.47779e-08	3.1511e-05	1
superpathway of menaquinol-10 biosynthesis	-0.889452	0.198009	-4.49523	0.000213124	-1.72428	0.280027	-6.16124	4.48167e-06	0.511574	0.280027	1.82826	0.0833674	0.0111672	0.00146299	1
superpathway of demethylmenaquinol-6 biosynthesis I	-1.44339	0.19982	-7.22996	4.53469e-07	-1.74135	0.282588	-6.16728	4.50649e-06	0.519866	0.282588	1.84102	0.081245	3.20373e-05	0.00147133	1
superpathway of menaquinol-9 biosynthesis	-0.889198	0.198076	-4.49216	0.000213771	-1.72376	0.280122	-6.15744	4.53244e-06	0.51138	0.280122	1.82668	0.0834926	0.0111815	0.00147987	1
superpathway of menaquinol-6 biosynthesis I	-0.889738	0.198347	-4.48882	0.000216073	-1.72303	0.280505	-6.14622	4.64131e-06	0.512209	0.280505	1.82731	0.0835017	0.0112922	0.00151462	1
superpathway of demethylmenaquinol-9 biosynthesis	-1.44321	0.200508	-7.20425	4.81679e-07	-1.74225	0.283561	-6.14865	4.6703e-06	0.520119	0.283561	1.836	0.0823121	3.38901e-05	0.00152376	1
GDP-D-glycero-&alpha;-D-manno-heptose biosynthesis	2.00616	0.13587	14.7782	1.7157e-12	-1.03207	0.192149	-5.37594	2.79346e-05	0.0854973	0.192149	0.445442	0.663207	2.27259e-10	0.00901721	1
superpathway of hexuronide and hexuronate degradation	3.66069	0.0909117	40.3372	3.2396e-21	-0.688596	0.128569	-5.36554	3.22452e-05	0.080394	0.128569	0.626404	0.54491	6.78481e-19	0.0103921	1
superpathway of &beta;-D-glucuronide and D-glucuronate degradation	3.63624	0.10334	35.2342	4.84035e-20	-0.758466	0.146144	-5.19717	4.52394e-05	0.048352	0.146144	0.331358	0.744922	9.66785e-18	0.0145186	1
4-deoxy-L-threo-hex-4-enopyranuronate degradation	4.00774	0.12449	32.2265	2.86666e-19	-0.858866	0.176055	-4.88307	8.82505e-05	0.239032	0.176055	1.35925	0.192623	5.58002e-17	0.0282083	1
sucrose degradation IV (sucrose phosphorylase)	2.54144	0.168887	15.0562	1.1169e-12	-1.06909	0.238843	-4.47872	0.000220892	-0.225712	0.238843	-0.945519	0.357659	1.52206e-10	0.0700338	1
glycolysis V (Pyrococcus)	-0.246525	0.153933	-1.60289	0.126699	0.957838	0.217694	4.40331	0.000269676	-0.504055	0.217694	-2.3169	0.0318573	1	0.0854162	1
D-fructuronate degradation	4.56344	0.0758588	60.3207	9.70859e-25	-0.470343	0.107281	-4.39582	0.000332736	0.130515	0.107281	1.22053	0.247732	2.57822e-22	0.104664	1
L-1,2-propanediol degradation	1.2752	0.133429	9.56627	4.92489e-09	0.776729	0.188697	4.12052	0.000535452	-0.0152044	0.188697	-0.0803939	0.905581	4.43046e-07	0.168341	1
peptidoglycan biosynthesis IV (Enterococcus faecium)	3.7091	0.091549	40.5861	2.79879e-21	0.52482	0.12947	4.06118	0.000671115	-0.122943	0.12947	-0.951285	0.360441	5.87276e-19	0.210169	1
Bifidobacterium shunt	3.38391	0.113537	29.8377	1.40118e-18	0.60708	0.160566	3.7854	0.00120745	-0.201484	0.160566	-1.25573	0.227902	2.66883e-16	0.374865	1
superpathway of polyamine biosynthesis I	0.572424	0.123667	4.63385	0.000160816	0.624437	0.174891	3.57442	0.00196757	0.0287323	0.174891	0.164166	0.856588	0.00868131	0.58581	1
superpathway of arginine and polyamine biosynthesis	1.48946	0.111724	13.3482	1.26642e-11	0.562596	0.158001	3.56505	0.00202586	0.0252564	0.158001	0.15961	0.856915	1.51008e-09	0.600938	1
NAD biosynthesis II (from tryptophan)	-10.4372	0.452738	-23.6918	4.52058e-14	2.0446	0.640268	3.25181	0.00836648	-0.33423	0.640268	-0.562359	0.515875	5.91044e-12	0.771261	1
catechol degradation II (meta-cleavage pathway)	-10.2138	0.462544	-22.6522	1.06745e-13	2.02312	0.654136	3.12509	0.00899591	-0.208177	0.654136	-0.378519	0.576336	1.27942e-11	0.836895	1
2-amino-3-carboxymuconate semialdehyde degradation to 2-oxopentenoate	-11.1142	0.450367	-25.3583	1.94684e-14	1.78373	0.636915	2.85655	0.0256684	-0.313465	0.636915	-0.523336	0.499735	2.59178e-12	0.856373	1
D-galacturonate degradation I	4.14965	0.0774535	53.7172	1.06623e-23	-0.357547	0.109536	-3.27249	0.00439266	0.110251	0.109536	1.00967	0.335798	2.53923e-21	0.859591	1
superpathway of fucose and rhamnose degradation	2.60266	0.0877321	29.7206	1.8193e-18	-0.407338	0.124072	-3.28873	0.00402325	-0.0165667	0.124072	-0.133469	0.854851	3.44384e-16	0.863877	1
arginine, ornithine and proline interconversion	0.998254	0.112979	8.84562	1.9202e-08	-0.52769	0.159776	-3.30659	0.00369919	0.0962393	0.159776	0.603564	0.557544	1.59612e-06	0.871163	1
adenosine nucleotides degradation IV	-12.1327	1.06617	-11.8804	5.64862e-08	-2.64542	1.5078	-1.83634	0.181434	-0.28235	1.5078	-0.2083	0.601582	3.67705e-06	0.956676	1
catechol degradation I (meta-cleavage pathway)	-9.60856	0.413483	-23.6302	2.28918e-15	1.5201	0.584753	2.62884	0.0265271	-0.250836	0.584753	-0.443177	0.597672	3.53512e-13	0.961194	1
superpathway of UDP-glucose-derived O-antigen building blocks biosynthesis	3.33954	0.0872852	38.3293	9.38141e-21	0.376069	0.12344	3.05307	0.00698087	-0.280419	0.12344	-2.27461	0.0362803	1.92031e-18	0.965327	1
catechol degradation III (ortho-cleavage pathway)	-12.5309	0.983195	-13.4797	4.72927e-07	-1.8646	1.39045	-1.38715	0.280265	-0.233713	1.39045	-0.15912	0.592634	2.4295e-05	0.989137	1
aromatic compounds degradation via &beta;-ketoadipate	-12.5592	0.994554	-13.4264	2.03941e-08	-1.93509	1.40651	-1.42299	0.25795	-0.186573	1.40651	-0.139009	0.599815	1.42684e-06	0.989258	1
superpathway of UDP-N-acetylglucosamine-derived O-antigen building blocks biosynthesis	1.62888	0.156166	10.4364	1.00858e-09	0.685467	0.220853	3.10586	0.00562286	-0.33984	0.220853	-1.53943	0.140887	9.90917e-08	0.98955	1
2-methylcitrate cycle II	-12.3258	0.972029	-13.3517	2.64034e-08	-2.01785	1.37466	-1.5056	0.247728	-0.252784	1.37466	-0.180651	0.617925	1.7873e-06	0.989975	1
catechol degradation to &beta;-ketoadipate	-12.6759	0.966821	-13.9273	1.05256e-08	-1.77797	1.36729	-1.33423	0.304011	-0.214522	1.36729	-0.155587	0.596985	7.65043e-07	0.993045	1
taxadiene biosynthesis (engineered)	2.58255	0.140926	18.3399	2.4751e-14	0.602179	0.1993	3.02403	0.00682902	-0.0642847	0.1993	-0.322577	0.751738	3.75706e-12	0.994756	1
nitrate reduction VI (assimilatory)	1.65656	0.135542	12.2316	5.96241e-11	0.574661	0.191685	3.00053	0.00723271	0.33086	0.191685	1.72732	0.101412	6.60444e-09	0.995445	1
meta cleavage pathway of aromatic compounds	-12.0077	1.00798	-12.6228	1.14531e-07	-1.52438	1.4255	-1.10192	0.360093	-0.467716	1.4255	-0.327788	0.5806	7.35581e-06	0.996635	1
L-rhamnose degradation I	3.46336	0.103742	33.4319	1.46547e-19	-0.431211	0.146713	-2.94276	0.00847549	0.172512	0.146713	1.17777	0.258553	2.8839e-17	0.99746	1
pyrimidine deoxyribonucleotides de novo biosynthesis III	2.94537	0.0710684	41.5617	2.13287e-21	0.257788	0.100506	2.57412	0.0211792	-0.100482	0.100506	-1.00056	0.341279	4.50729e-19	0.997615	1
coenzyme M biosynthesis I	-14.9601	1.13544	-13.8632	4.19166e-09	0.711909	1.60575	0.466267	0.492881	0.339278	1.60575	0.241504	0.500783	3.10911e-07	0.997617	1
norspermidine biosynthesis	-12.2429	0.989258	-13.0337	1.89496e-08	-1.37047	1.39902	-1.00618	0.377313	0.0227812	1.39902	0.0341794	0.640843	1.30206e-06	0.998473	1
L-leucine degradation I	-14.5134	1.2209	-12.345	2.89582e-08	0.275678	1.72662	0.162514	0.51486	1.26714	1.72662	0.760418	0.466849	1.93234e-06	0.998989	1
toluene degradation III (aerobic) (via p-cresol)	-13.6362	1.0565	-13.6158	3.94464e-08	-0.78535	1.49411	-0.54715	0.496692	-0.30603	1.49411	-0.219764	0.532499	2.48975e-06	0.999173	1
UDP-N-acetyl-D-glucosamine biosynthesis I	4.62036	0.0898829	51.5046	2.10157e-23	0.321897	0.127114	2.53789	0.0212501	-0.199169	0.127114	-1.56933	0.137951	4.92094e-21	0.999377	1
octane oxidation	-12.2785	0.987699	-13.1802	7.22747e-09	-1.26198	1.39682	-0.915948	0.413479	-0.0338373	1.39682	-0.00132057	0.611631	5.51144e-07	0.999678	1
nicotinate degradation I	-14.2637	1.08528	-13.791	4.39668e-09	-0.429752	1.53482	-0.286026	0.505176	-0.80087	1.53482	-0.549806	0.465042	3.28726e-07	0.999757	1
2-methylcitrate cycle I	-12.3312	0.95665	-13.6486	9.7731e-09	-1.24864	1.35291	-0.937452	0.406128	-0.445515	1.35291	-0.339624	0.59275	7.04525e-07	0.999874	1
N10-formyl-tetrahydrofolate biosynthesis	5.00261	0.0845836	59.2763	1.21806e-24	0.171571	0.119619	1.43808	0.173786	-0.092755	0.119619	-0.776571	0.455125	3.19584e-22	1	1
superpathway of chorismate metabolism	-4.77844	0.362017	-13.2072	1.35574e-11	0.836269	0.51197	1.63375	0.119274	0.809978	0.51197	1.58281	0.131008	1.61709e-09	1	1
homolactic fermentation	4.52928	0.066593	68.2222	7.30058e-26	0.0937553	0.0941767	0.99915	0.344641	0.0430841	0.0941767	0.459875	0.655429	2.23952e-23	1	1
glycolysis III (from glucose)	5.37472	0.0803309	67.073	9.74653e-26	0.181785	0.113605	1.60479	0.132031	-0.0987445	0.113605	-0.870547	0.404076	3.09531e-23	1	1
superpathway of L-arginine, putrescine, and 4-aminobutanoate degradation	-12.2227	1.13104	-11.0437	2.46213e-08	1.1983	1.59953	0.72022	0.490785	2.56642	1.59953	1.58982	0.161543	1.65746e-06	1	1
L-arginine biosynthesis I (via L-ornithine)	4.93765	0.0886598	55.8075	4.15986e-24	0.173599	0.125384	1.38791	0.18783	-0.1376	0.125384	-1.09914	0.292653	1.03479e-21	1	1
L-arginine biosynthesis II (acetyl cycle)	4.97011	0.090168	55.2309	5.03955e-24	0.185174	0.127517	1.45554	0.167892	-0.150053	0.127517	-1.17856	0.259949	1.23321e-21	1	1
chorismate biosynthesis I	5.19164	0.0879246	59.1726	1.23672e-24	0.141174	0.124344	1.13828	0.276848	-0.115457	0.124344	-0.929994	0.371671	3.24102e-22	1	1
superpathway of L-aspartate and L-asparagine biosynthesis	5.06633	0.0838176	60.5806	7.77605e-25	0.158961	0.118536	1.34464	0.202354	-0.0655392	0.118536	-0.553639	0.593004	2.09919e-22	1	1
L-arginine degradation II (AST pathway)	-13.1098	1.27266	-10.5939	2.74638e-08	0.759498	1.79981	0.409954	0.577121	1.71716	1.79981	0.975543	0.400734	2.00872e-06	1	1
biotin biosynthesis I	3.60063	0.145982	24.6826	6.29483e-17	-0.49641	0.20645	-2.40586	0.0262835	0.255246	0.20645	1.23746	0.232818	1.13692e-14	1	1
superpathway of branched amino acid biosynthesis	5.28825	0.0841884	62.9588	3.50756e-25	0.152662	0.11906	1.28572	0.221935	-0.0919493	0.11906	-0.773457	0.456947	1.01446e-22	1	1
Calvin-Benson-Bassham cycle	5.50303	0.0933394	59.0663	1.19891e-24	0.224982	0.132002	1.70802	0.108186	-0.132377	0.132002	-1.00428	0.334526	3.15095e-22	1	1
pyruvate fermentation to butanoate	1.10345	0.178906	6.17103	4.29819e-06	-0.400821	0.253011	-1.58484	0.129572	0.162955	0.253011	0.644791	0.528181	0.00027874	1	1
coenzyme A biosynthesis I	5.00109	0.0810907	61.8219	5.23709e-25	0.199652	0.11468	1.74578	0.102731	-0.120778	0.11468	-1.05505	0.313642	1.46224e-22	1	1
adenosylcobalamin salvage from cobinamide I	4.43909	0.0712691	62.4902	5.25672e-25	-0.0359007	0.10079	-0.3568	0.720748	-0.0465661	0.10079	-0.462364	0.653784	1.45587e-22	1	1
colanic acid building blocks biosynthesis	3.80136	0.0773644	49.2633	5.82196e-23	0.144202	0.10941	1.32309	0.211579	-0.131886	0.10941	-1.20637	0.251285	1.31997e-20	1	1
superpathway of aromatic amino acid biosynthesis	5.25589	0.0882177	59.7047	1.01567e-24	0.144237	0.124759	1.15897	0.268372	-0.117371	0.124759	-0.942238	0.365573	2.69599e-22	1	1
L-lysine biosynthesis I	4.8828	0.0793438	61.6918	5.47673e-25	0.0754731	0.112209	0.674635	0.517023	-0.106227	0.112209	-0.948348	0.364548	1.51895e-22	1	1
superpathway of purine nucleotides de novo biosynthesis II	4.45644	0.0687968	64.9771	2.08768e-25	0.0207667	0.0972933	0.216042	0.795807	0.0366153	0.0972933	0.379444	0.705927	6.11872e-23	1	1
dTDP-L-rhamnose biosynthesis I	5.02005	0.08136	61.8532	5.31073e-25	0.0705548	0.11506	0.615437	0.553821	-0.0322073	0.11506	-0.279965	0.774382	1.48087e-22	1	1
enterobacterial common antigen biosynthesis	-12.2005	1.1423	-10.8952	9.3238e-09	1.23875	1.61545	0.746817	0.482703	2.68385	1.61545	1.65361	0.143932	7.09774e-07	1	1
enterobactin biosynthesis	-7.98077	0.511772	-15.6193	6.71414e-13	1.37343	0.723754	1.89865	0.0781168	1.04902	0.723754	1.45171	0.173183	9.24773e-11	1	1
fatty acid &beta;-oxidation I	0.0241186	0.156752	0.153482	0.874118	-0.167045	0.221681	-0.75381	0.462362	0.148944	0.221681	0.672713	0.511605	1	1	1
fatty acid elongation -- saturated	4.36767	0.0818918	53.453	1.01948e-23	-0.00262247	0.115812	-0.0213386	0.870252	0.109501	0.115812	0.948947	0.364249	2.43638e-21	1	1
superpathway of fatty acid biosynthesis initiation (E. coli)	3.60105	0.186864	19.2795	8.58184e-15	-0.574096	0.264266	-2.17317	0.0420942	0.270173	0.264266	1.02289	0.320097	1.34256e-12	1	1
mixed acid fermentation	4.42547	0.0738274	60.1034	9.56191e-25	-0.161748	0.104408	-1.5522	0.145085	-0.117242	0.104408	-1.12525	0.285373	2.54288e-22	1	1
superpathway of tetrahydrofolate biosynthesis and salvage	4.56908	0.0733692	62.4523	4.6199e-25	0.00669573	0.10376	0.0661419	0.852107	-0.0175753	0.10376	-0.168928	0.826909	1.29772e-22	1	1
fucose degradation	1.9872	0.109165	18.2258	3.06392e-14	-0.28658	0.154383	-1.85839	0.0806437	-0.0851084	0.154383	-0.551726	0.591521	4.62734e-12	1	1
D-galactarate degradation I	-3.42487	0.239958	-14.283	3.18345e-12	-0.206493	0.339352	-0.608935	0.552951	-0.680308	0.339352	-2.00646	0.060144	4.08076e-10	1	1
superpathway of N-acetylglucosamine, N-acetylmannosamine and N-acetylneuraminate degradation	4.74072	0.0965269	49.1886	5.02112e-23	0.221153	0.13651	1.62276	0.125192	-0.11665	0.13651	-0.855816	0.409063	1.14289e-20	1	1
D-glucarate degradation I	-1.21719	0.2453	-4.96353	6.79104e-05	0.566303	0.346906	1.63292	0.118627	-0.307319	0.346906	-0.8861	0.387334	0.00398231	1	1
superpathway of D-glucarate and D-galactarate degradation	-3.42228	0.239931	-14.2736	3.20238e-12	-0.207162	0.339314	-0.610843	0.55171	-0.681921	0.339314	-2.01161	0.0596714	4.10843e-10	1	1
gluconeogenesis I	5.05117	0.072912	69.477	5.12809e-26	0.0571892	0.103113	0.557361	0.593546	-0.0583934	0.103113	-0.567022	0.585934	1.66202e-23	1	1
glucose and glucose-1-phosphate degradation	-1.04112	0.728801	-1.43457	0.167946	-0.606408	1.03068	-0.585253	0.565233	-0.267961	1.03068	-0.260961	0.796769	1	1	1
L-ornithine biosynthesis	4.85702	0.0926724	52.5109	1.42186e-23	0.16866	0.131059	1.28975	0.218819	-0.145556	0.131059	-1.11228	0.286399	3.36729e-21	1	1
glycogen degradation I (bacterial)	5.40693	0.0856584	63.261	3.09585e-25	0.142268	0.121139	1.17744	0.261601	-0.0975291	0.121139	-0.806413	0.437833	9.0729e-23	1	1
glycogen biosynthesis I (from ADP-D-Glucose)	5.2707	0.0868235	60.8337	6.78477e-25	0.191462	0.122787	1.56302	0.140389	-0.119218	0.122787	-0.972571	0.35085	1.84995e-22	1	1
superpathway of glycol metabolism and degradation	-8.83168	0.571288	-15.5043	1.01954e-12	1.02767	0.807924	1.27117	0.232852	1.25406	0.807924	1.55273	0.148408	1.355e-10	1	1
glycolysis I (from glucose 6-phosphate)	4.8025	0.0649163	74.2145	1.30806e-26	0.117942	0.0918054	1.28963	0.22659	0.0261036	0.0918054	0.286467	0.756043	4.27735e-24	1	1
superpathway of glycolysis and Entner-Doudoroff	3.41258	0.102211	33.4395	1.50012e-19	0.0748921	0.144549	0.51956	0.613822	0.0863477	0.144549	0.599699	0.560954	2.94839e-17	1	1
superpathway of glycolysis, pyruvate dehydrogenase, TCA, and glyoxylate bypass	-6.84327	0.497246	-13.775	6.46879e-12	1.14789	0.703212	1.63252	0.121998	1.12834	0.703212	1.60512	0.128494	7.98369e-10	1	1
glyoxylate cycle	-8.83465	0.571461	-15.5062	1.06805e-12	1.02575	0.808168	1.26898	0.234793	1.25582	0.808168	1.5562	0.148702	1.40313e-10	1	1
heme biosynthesis I (aerobic)	-0.256536	0.182277	-1.40822	0.175874	0.147917	0.257779	0.574288	0.573969	-0.375702	0.257779	-1.45793	0.161748	1	1	1
heme biosynthesis II (anaerobic)	0.921898	0.206284	4.47084	0.000219356	0.387716	0.29173	1.3298	0.199641	-0.319248	0.29173	-1.0947	0.287904	0.0114898	1	1
superpathway of hexitol degradation (bacteria)	0.692108	0.160029	4.3274	0.000316455	-0.114123	0.226316	-0.504452	0.621487	0.0710412	0.226316	0.314048	0.757928	0.0159778	1	1
L-histidine degradation I	2.76578	0.109673	25.2488	4.41047e-17	-0.212981	0.155101	-1.37418	0.188927	0.298425	0.155101	1.92694	0.0710989	8.03443e-15	1	1
L-histidine biosynthesis	4.96655	0.089457	55.6334	4.45885e-24	0.128012	0.126511	1.01438	0.330905	-0.106613	0.126511	-0.843946	0.416519	1.1031e-21	1	1
L-methionine biosynthesis I	1.3287	0.141034	9.42916	6.20467e-09	0.114639	0.199452	0.575545	0.574198	0.102663	0.199452	0.515816	0.614208	5.50463e-07	1	1
L-methionine biosynthesis III	1.35132	0.135713	9.96554	2.38735e-09	0.264357	0.191927	1.379	0.186396	0.104907	0.191927	0.547627	0.593033	2.2294e-07	1	1
L-isoleucine biosynthesis I (from threonine)	5.38597	0.081934	65.8924	1.39043e-25	0.160107	0.115872	1.38558	0.189782	-0.0903312	0.115872	-0.780764	0.453197	4.32435e-23	1	1
superpathway of (Kdo)2-lipid A biosynthesis	-11.2528	1.22768	-9.2834	3.86065e-08	1.62432	1.73621	0.922251	0.39948	3.31946	1.73621	1.9041	0.081727	2.87584e-06	1	1
ketogluconate metabolism	-14.5528	1.28715	-11.6727	3.67871e-08	0.626666	1.8203	0.368341	0.529284	1.71583	1.8203	0.985233	0.391768	2.39532e-06	1	1
lactose and galactose degradation I	-1.04283	0.368222	-2.83257	0.0100743	0.97906	0.520744	1.88054	0.0744602	-0.295437	0.520744	-0.567483	0.577072	0.355488	1	1
superpathway of lipopolysaccharide biosynthesis	-15.0262	1.11226	-14.2623	1.94968e-08	0.273642	1.57297	0.176951	0.464665	0.333748	1.57297	0.21817	0.516202	1.31261e-06	1	1
superpathway of S-adenosyl-L-methionine biosynthesis	1.91575	0.13675	14.0217	4.67654e-12	0.117144	0.193393	0.606492	0.554078	0.0983612	0.193393	0.509797	0.618613	5.84861e-10	1	1
methanogenesis from acetate	-0.235225	0.270202	-0.870913	0.394829	-0.465979	0.382123	-1.21972	0.237317	-0.892285	0.382123	-2.33582	0.0299067	1	1	1
superpathway of methylglyoxal degradation	-10.9181	0.925292	-12.1429	7.64109e-08	-0.0296337	1.30856	-0.0406158	0.675989	1.82	1.30856	1.39229	0.20895	4.77852e-06	1	1
NAD salvage pathway II	-0.371588	0.226259	-1.64272	0.116549	-0.551775	0.319979	-1.72492	0.100525	0.648664	0.319979	2.02769	0.056184	1	1	1
lipid IVA biosynthesis	3.00636	0.123152	24.4368	8.26985e-17	-0.200463	0.174164	-1.15169	0.266724	0.184852	0.174164	1.06307	0.304786	1.48077e-14	1	1
methylerythritol phosphate pathway I	5.17479	0.0848113	61.1547	6.40785e-25	0.159272	0.119941	1.33158	0.206521	-0.0945093	0.119941	-0.789187	0.447959	1.75608e-22	1	1
pentose phosphate pathway (non-oxidative branch)	5.70535	0.0846271	67.5683	7.86964e-26	0.134495	0.119681	1.12676	0.282337	-0.0913924	0.119681	-0.764789	0.461898	2.52152e-23	1	1
O-antigen building blocks biosynthesis (E. coli)	4.7665	0.0858737	55.6253	4.4517e-24	0.199138	0.121444	1.64397	0.122374	-0.124957	0.121444	-1.0305	0.323669	1.10074e-21	1	1
superpathway of L-arginine and L-ornithine degradation	-12.1677	1.10992	-11.1928	7.05575e-09	1.18041	1.56967	0.725548	0.486143	2.55452	1.56967	1.61554	0.155741	5.37725e-07	1	1
superpathway of ornithine degradation	-11.9201	1.06964	-11.4684	1.81416e-07	0.766893	1.5127	0.469492	0.575415	2.81461	1.5127	1.85665	0.0976613	1.11206e-05	1	1
TCA cycle IV (2-oxoglutarate decarboxylase)	-6.22591	0.441632	-14.1083	4.02546e-12	1.05095	0.624562	1.68296	0.11023	0.907528	0.624562	1.45351	0.165522	5.09494e-10	1	1
pyruvate fermentation to propanoate I	3.97427	0.104954	37.9197	1.07637e-20	-0.218163	0.148427	-1.47111	0.160959	0.136929	0.148427	0.924463	0.372338	2.20578e-18	1	1
heterolactic fermentation	2.9388	0.0891486	33.0178	1.94245e-19	0.223583	0.126075	1.77708	0.0960689	-0.124292	0.126075	-0.986663	0.343447	3.79865e-17	1	1
superpathway of (R,R)-butanediol biosynthesis	-2.57838	0.404444	-6.37595	2.59675e-06	0.000207361	0.571971	0.000411804	0.959401	-0.0581633	0.571971	-0.101718	0.916844	0.000173987	1	1
acetylene degradation	4.03129	0.0814687	49.5803	4.6351e-23	-0.0829516	0.115214	-0.721365	0.488177	-0.177582	0.115214	-1.54404	0.145739	1.05533e-20	1	1
L-glutamate degradation V (via hydroxyglutarate)	0.58565	0.147918	3.96215	0.000758541	0.0955059	0.209188	0.457467	0.65461	-0.1689	0.209188	-0.807609	0.431468	0.0359601	1	1
L-lysine fermentation to acetate and butanoate	0.473346	0.134091	3.533	0.00211391	0.129777	0.189633	0.685213	0.504597	0.086375	0.189633	0.456117	0.655966	0.0920443	1	1
purine nucleobases degradation I (anaerobic)	3.04118	0.118901	25.6038	3.18282e-17	0.335094	0.168151	1.99546	0.061859	-0.275266	0.168151	-1.63813	0.119731	5.80338e-15	1	1
reductive TCA cycle I	0.0352863	0.662045	0.0533075	0.957717	-1.00368	0.936273	-1.07186	0.296184	-0.545957	0.936273	-0.583215	0.566137	1	1	1
superpathway of L-lysine, L-threonine and L-methionine biosynthesis I	2.90783	0.141728	20.5323	2.58845e-15	-0.0240949	0.200434	-0.120167	0.890805	0.0534923	0.200434	0.267834	0.792308	4.19177e-13	1	1
incomplete reductive TCA cycle	4.38652	0.101843	43.1348	7.58416e-22	-0.21949	0.144027	-1.52534	0.147163	0.161852	0.144027	1.12611	0.279759	1.64469e-19	1	1
superpathway of N-acetylneuraminate degradation	3.96685	0.0822633	48.3352	8.64933e-23	0.142644	0.116338	1.22985	0.242545	0.0185991	0.116338	0.162383	0.83409	1.94438e-20	1	1
hexitol fermentation to lactate, formate, ethanol and acetate	-0.0199347	0.33837	-0.0588871	0.947086	0.926757	0.478528	1.93714	0.0667399	-0.401827	0.478528	-0.839879	0.411151	1	1	1
myo-inositol degradation I	-1.71804	0.283049	-6.07127	5.20898e-06	0.0679153	0.400291	0.169696	0.8669	0.63066	0.400291	1.57593	0.130995	0.000334283	1	1
phosphopantothenate biosynthesis I	4.1198	0.0728312	56.7529	3.83032e-24	-0.0435703	0.102999	-0.422997	0.678418	0.0138865	0.102999	0.137218	0.831879	9.49861e-22	1	1
pantothenate and coenzyme A biosynthesis I	4.34803	0.0707327	61.6827	7.0486e-25	0.00181917	0.100031	0.0195962	0.85018	-0.0148622	0.100031	-0.14721	0.82918	1.91066e-22	1	1
pentose phosphate pathway	3.65047	0.0885435	41.3033	1.98755e-21	-0.257899	0.125219	-2.06287	0.0557247	0.187048	0.125219	1.49632	0.156726	4.19458e-19	1	1
peptidoglycan biosynthesis I (meso-diaminopimelate containing)	5.09329	0.0808703	63.1328	3.38185e-25	0.191588	0.114368	1.67982	0.115603	-0.107836	0.114368	-0.944535	0.365847	9.8166e-23	1	1
superpathway of phospholipid biosynthesis I (bacteria)	5.20404	0.0869728	59.9587	9.09255e-25	0.200932	0.122998	1.63751	0.123359	-0.140691	0.122998	-1.14566	0.273666	2.43032e-22	1	1
superpathway of polyamine biosynthesis II	-0.299954	0.268711	-1.11662	0.277915	0.354302	0.380015	0.932878	0.362822	-0.133346	0.380015	-0.351106	0.729688	1	1	1
polyisoprenoid biosynthesis (E. coli)	4.10319	0.0862073	47.6979	1.08808e-22	-0.0709753	0.121916	-0.582061	0.573805	0.0670192	0.121916	0.552241	0.594097	2.43652e-20	1	1
ppGpp biosynthesis	-10.5633	0.943609	-11.5812	1.25319e-07	-0.0649716	1.33447	-0.0790225	0.694861	2.20063	1.33447	1.66011	0.128858	7.88053e-06	1	1
protocatechuate degradation II (ortho-cleavage pathway)	-12.1291	0.935153	-13.7496	2.89558e-08	-0.903149	1.32251	-0.695246	0.481996	0.534525	1.32251	0.433368	0.581777	1.93445e-06	1	1
superpathway of histidine, purine, and pyrimidine biosynthesis	2.7174	0.363846	7.46972	2.48555e-07	-0.576253	0.514556	-1.12003	0.275876	0.00882882	0.514556	0.0172479	0.96828	1.83247e-05	1	1
CMP-3-deoxy-D-manno-octulosonate biosynthesis I	3.00265	0.125296	23.9892	1.19954e-16	-0.225972	0.177196	-1.27616	0.219863	0.186926	0.177196	1.05654	0.30753	2.1249e-14	1	1
formaldehyde assimilation II (RuMP Cycle)	1.24596	0.1746	7.13928	5.22463e-07	0.435202	0.246921	1.76326	0.0939141	0.272154	0.246921	1.10247	0.285072	3.66305e-05	1	1
L-lysine biosynthesis II	1.34618	0.264871	5.08387	5.08092e-05	0.563842	0.374584	1.5057	0.147969	-0.0176035	0.374584	-0.0470405	0.949424	0.00302574	1	1
L-lysine biosynthesis III	5.27645	0.0798826	66.2205	1.28901e-25	0.139241	0.112971	1.23643	0.240864	-0.0915874	0.112971	-0.811929	0.436051	4.03344e-23	1	1
superpathway of L-isoleucine biosynthesis I	5.23134	0.0816603	64.2184	2.39632e-25	0.144509	0.115485	1.25504	0.233501	-0.0810291	0.115485	-0.702575	0.499225	7.18395e-23	1	1
glycine betaine degradation I	-14.3211	1.20904	-12.2389	1.22432e-08	0.114769	1.70984	0.0887301	0.553906	1.16496	1.70984	0.717721	0.479697	8.82943e-07	1	1
aerobic respiration I (cytochrome c)	1.17941	0.283681	4.15836	0.000453431	-0.79698	0.401185	-1.98687	0.0605622	-0.0372526	0.401185	-0.0927428	0.924439	0.0223066	1	1
urea cycle	2.44142	0.11793	20.723	2.27362e-15	0.404974	0.166778	2.43112	0.0255794	0.176006	0.166778	1.05662	0.307825	3.69553e-13	1	1
biotin biosynthesis II	-2.54167	1.00287	-2.63423	0.0258651	-1.3406	1.41827	-0.929311	0.364958	-1.67702	1.41827	-1.22931	0.244001	0.555976	1	1
4-aminobutanoate degradation V	0.076152	0.156102	0.487975	0.633061	0.439269	0.220761	1.99133	0.0614844	-0.458053	0.220761	-2.07619	0.0518707	1	1	1
L-glutamate degradation VIII (to propanoate)	-4.17243	1.26526	-3.30018	0.00350581	3.3208	1.78935	1.85661	0.0780255	-0.0920827	1.78935	-0.0529838	0.912686	0.143691	1	1
L-lysine biosynthesis VI	5.2975	0.0829524	64.0104	2.4967e-25	0.139549	0.117312	1.19288	0.256227	-0.0991576	0.117312	-0.846657	0.416359	7.45523e-23	1	1
pyruvate fermentation to acetate and lactate II	5.31348	0.0828337	64.2907	2.2173e-25	0.235569	0.117144	2.01599	0.0619585	-0.112288	0.117144	-0.960189	0.357758	6.66434e-23	1	1
L-isoleucine biosynthesis II	5.48422	0.0828322	66.3651	1.18565e-25	0.158045	0.117142	1.35296	0.199971	-0.0919013	0.117142	-0.785689	0.450246	3.72991e-23	1	1
L-isoleucine biosynthesis III	5.25555	0.0856681	61.485	5.70075e-25	0.148114	0.121153	1.22587	0.243249	-0.0898439	0.121153	-0.742592	0.474472	1.58003e-22	1	1
L-isoleucine biosynthesis IV	5.4409	0.0832888	65.4794	1.5664e-25	0.172187	0.117788	1.46593	0.166376	-0.0931368	0.117788	-0.791915	0.446606	4.81692e-23	1	1
superpathway of geranylgeranyl diphosphate biosynthesis II (via MEP)	5.11405	0.0834922	61.3958	6.01654e-25	0.168244	0.118076	1.4288	0.176691	-0.0982911	0.118076	-0.833786	0.423093	1.6589e-22	1	1
L-arginine biosynthesis III (via N-acetyl-L-citrulline)	3.46301	0.122314	28.3415	4.01914e-18	-0.406475	0.172978	-2.35196	0.0299088	0.202809	0.172978	1.17397	0.258325	7.53135e-16	1	1
glutaryl-CoA degradation	0.267523	0.179168	1.49371	0.151916	-0.379659	0.253382	-1.49906	0.150801	0.155078	0.253382	0.61274	0.54874	1	1	1
toluene degradation IV (aerobic) (via catechol)	-13.5757	1.01985	-14.0397	4.94418e-09	-0.401922	1.44229	-0.276819	0.525593	-0.307935	1.44229	-0.210824	0.533583	3.65414e-07	1	1
toluene degradation I (aerobic) (via o-cresol)	-5.05067	0.405117	-12.4746	3.94766e-11	1.58421	0.572922	2.76655	0.0119566	-0.0283871	0.572922	-0.0499261	0.911152	4.46817e-09	1	1
toluene degradation II (aerobic) (via 4-methylcatechol)	-5.04671	0.404731	-12.4767	3.93363e-11	1.57964	0.572377	2.76113	0.0121221	-0.0357296	0.572377	-0.0627354	0.91005	4.44127e-09	1	1
tetrapyrrole biosynthesis I (from glutamate)	4.25325	0.105116	40.5212	2.78073e-21	0.317421	0.148657	2.13872	0.0471417	-0.216995	0.148657	-1.46163	0.163876	5.85799e-19	1	1
tetrapyrrole biosynthesis II (from glycine)	4.19367	0.107263	39.1501	5.54581e-21	0.309425	0.151693	2.04294	0.0568205	-0.22925	0.151693	-1.51314	0.150052	1.14784e-18	1	1
peptidoglycan biosynthesis II (staphylococci)	-4.80093	0.595728	-8.06182	7.61609e-08	2.34545	0.842486	2.78451	0.0112498	0.135297	0.842486	0.160348	0.871945	5.89842e-06	1	1
superpathway of sulfur oxidation (Acidianus ambivalens)	1.40505	0.171835	8.18134	6.27101e-08	0.402395	0.243011	1.65702	0.114292	0.183829	0.243011	0.757394	0.459799	4.89104e-06	1	1
superpathway of L-methionine biosynthesis (by sulfhydrylation)	1.36965	0.153485	8.93015	1.52594e-08	0.289765	0.217061	1.33612	0.19871	-0.346189	0.217061	-1.59556	0.127665	1.2878e-06	1	1
superpathway of L-methionine biosynthesis (transsulfuration)	2.42461	0.130412	18.6104	1.93194e-14	0.116013	0.18443	0.6299	0.539078	0.0923421	0.18443	0.502014	0.624132	2.95444e-12	1	1
glycolysis II (from fructose 6-phosphate)	4.38291	0.0815062	53.8865	8.29078e-24	0.104867	0.115267	0.91207	0.382376	0.0894779	0.115267	0.778489	0.454873	1.98961e-21	1	1
L-glutamate and L-glutamine biosynthesis	5.08881	0.10139	50.268	3.22359e-23	0.127932	0.143387	0.893853	0.388239	-0.139319	0.143387	-0.972987	0.348344	7.45435e-21	1	1
adenosylcobalamin biosynthesis I (early cobalt insertion)	-14.0995	1.53539	-9.37968	6.0698e-07	0.277701	2.17137	0.136301	0.607799	2.03811	2.17137	0.972789	0.4039	3.50617e-05	1	1
adenosylcobalamin biosynthesis from cobyrinate a,c-diamide I	4.40896	0.0700674	63.134	4.32618e-25	-0.0503094	0.0990902	-0.508644	0.623283	-0.0390389	0.0990902	-0.393818	0.697605	1.22213e-22	1	1
GDP-mannose biosynthesis	4.2564	0.07234	59.0116	1.45643e-24	-0.00073619	0.102304	-0.00557675	0.855742	0.0196083	0.102304	0.194435	0.809386	3.77518e-22	1	1
CDP-diacylglycerol biosynthesis I	5.32468	0.0849342	62.8291	3.54507e-25	0.195586	0.120115	1.63235	0.124837	-0.127003	0.120115	-1.05911	0.310845	1.02249e-22	1	1
acetyl-CoA fermentation to butanoate II	2.84653	0.116618	24.439	8.5301e-17	0.251171	0.164922	1.5252	0.146513	-0.00507773	0.164922	-0.0305599	0.909395	1.51926e-14	1	1
succinate fermentation to butanoate	-2.54613	0.342483	-7.43705	2.74878e-07	0.536047	0.484344	1.10732	0.282084	-0.494402	0.484344	-1.02069	0.320582	2.01062e-05	1	1
UMP biosynthesis	5.30362	0.082355	64.5526	2.10964e-25	0.177967	0.116467	1.53231	0.148999	-0.10971	0.116467	-0.943602	0.366078	6.37215e-23	1	1
urate biosynthesis/inosine 5'-phosphate degradation	4.34847	0.0824325	52.8708	1.27365e-23	-0.102409	0.116577	-0.87927	0.398678	0.113326	0.116577	0.975635	0.35095	3.01927e-21	1	1
1,4-dihydroxy-2-naphthoate biosynthesis I	-0.510422	0.289589	-1.76319	0.0931176	-0.0331752	0.40954	-0.0808355	0.931169	-0.0582799	0.40954	-0.142275	0.888301	1	1	1
superpathway of menaquinol-8 biosynthesis I	0.9821	0.258148	3.80541	0.00105671	-0.0490532	0.365076	-0.134354	0.893306	-0.0107028	0.365076	-0.0291635	0.953871	0.0488266	1	1
superpathway of menaquinol-7 biosynthesis	0.994386	0.259085	3.83917	0.000975448	-0.045939	0.366402	-0.12529	0.899828	-0.0134541	0.366402	-0.0365722	0.952334	0.0456407	1	1
ubiquinol-7 biosynthesis (prokaryotic)	-0.608609	0.395444	-1.53947	0.139187	-1.12539	0.559243	-2.01262	0.0575014	0.125271	0.559243	0.224142	0.825054	1	1	1
ubiquinol-9 biosynthesis (prokaryotic)	-0.607851	0.395047	-1.53915	0.139273	-1.12578	0.558681	-2.01536	0.0571856	0.123889	0.558681	0.221915	0.826781	1	1	1
ubiquinol-10 biosynthesis (prokaryotic)	-0.608898	0.395142	-1.54145	0.138735	-1.12338	0.558816	-2.01049	0.0577188	0.125188	0.558816	0.224227	0.824977	1	1	1
superpathway of demethylmenaquinol-8 biosynthesis	0.515388	0.270356	1.90678	0.0708855	-0.0336144	0.382341	-0.0878922	0.92742	-0.0269407	0.382341	-0.0703828	0.937431	1	1	1
superpathway of phylloquinol biosynthesis	-0.322612	0.288588	-1.11831	0.277095	-0.0322067	0.408125	-0.0787764	0.932576	-0.058003	0.408125	-0.142019	0.887985	1	1	1
superpathway of menaquinol-11 biosynthesis	0.837485	0.263149	3.18331	0.00455024	-0.0452717	0.372149	-0.121544	0.902699	-0.0176113	0.372149	-0.0471236	0.947965	0.178713	1	1
superpathway of menaquinol-12 biosynthesis	0.837167	0.263184	3.18181	0.00457102	-0.0444881	0.372198	-0.11954	0.904141	-0.0177754	0.372198	-0.0475894	0.947674	0.17927	1	1
superpathway of menaquinol-13 biosynthesis	0.837622	0.263074	3.18477	0.00453401	-0.0452049	0.372043	-0.121438	0.902991	-0.0178906	0.372043	-0.0479492	0.948799	0.178225	1	1
superpathway of geranylgeranyldiphosphate biosynthesis I (via mevalonate)	-1.19493	0.514131	-2.32438	0.0303442	1.28647	0.727091	1.76961	0.0916249	-0.491931	0.727091	-0.67667	0.506393	0.950774	1	1
TCA cycle VI (obligate autotrophs)	2.99828	0.146209	20.5227	2.63051e-15	0.221999	0.20677	1.07492	0.29814	-0.117477	0.20677	-0.567979	0.578586	4.25292e-13	1	1
superpathay of heme biosynthesis from glutamate	0.967381	0.172178	5.62131	1.49952e-05	0.158568	0.243497	0.651851	0.523993	-0.366721	0.243497	-1.50655	0.148865	0.000923172	1	1
superpathway of heme biosynthesis from glycine	-0.404381	0.558901	-0.724816	0.477016	-2.30782	0.790406	-2.92245	0.00825397	0.0288657	0.790406	0.0366637	0.967076	1	1	1
palmitate biosynthesis II (bacteria and plants)	3.77529	0.172448	21.9026	6.68799e-16	-0.417213	0.243878	-1.71138	0.103267	-0.0884856	0.243878	-0.363158	0.721474	1.13286e-13	1	1
cis-vaccenate biosynthesis	5.32769	0.0782877	68.2346	7.09403e-26	0.156224	0.110716	1.41557	0.181843	-0.0795393	0.110716	-0.719432	0.489824	2.2829e-23	1	1
stearate biosynthesis II (bacteria and plants)	3.79346	0.184955	20.5194	2.47041e-15	-0.575855	0.261566	-2.20233	0.0396594	0.279498	0.261566	1.06913	0.299222	3.99513e-13	1	1
5-aminoimidazole ribonucleotide biosynthesis I	5.22126	0.0787136	66.5024	1.18563e-25	0.173954	0.111318	1.56746	0.140993	-0.0841765	0.111318	-0.757306	0.46742	3.72795e-23	1	1
5-aminoimidazole ribonucleotide biosynthesis II	5.21968	0.07983	65.548	1.57173e-25	0.188322	0.112897	1.67304	0.117296	-0.0955841	0.112897	-0.847935	0.416326	4.83321e-23	1	1
inosine-5'-phosphate biosynthesis I	5.09022	0.0793887	64.2818	2.41623e-25	0.167367	0.112273	1.49534	0.159151	-0.0846236	0.112273	-0.754804	0.468777	7.23625e-23	1	1
superpathway of guanosine nucleotides de novo biosynthesis II	4.11848	0.0778132	53.0546	1.22582e-23	-0.0190645	0.110045	-0.172236	0.827334	0.0783554	0.110045	0.715247	0.493204	2.90367e-21	1	1
superpathway of adenosine nucleotides de novo biosynthesis II	5.15952	0.0685019	75.5557	9.17319e-27	0.0393707	0.0968763	0.409026	0.690267	-0.0566151	0.0968763	-0.58498	0.574878	3.02164e-24	1	1
6-hydroxymethyl-dihydropterin diphosphate biosynthesis I	4.54731	0.095113	47.8947	9.40575e-23	0.102701	0.13451	0.765329	0.459964	-0.0692329	0.13451	-0.515332	0.617293	2.10802e-20	1	1
S-adenosyl-L-methionine cycle I	4.43673	0.069792	63.7727	3.13392e-25	-0.0975474	0.0987008	-0.991134	0.346863	-0.0523254	0.0987008	-0.531518	0.609228	9.06953e-23	1	1
chorismate biosynthesis from 3-dehydroquinate	5.2297	0.0872816	60.0461	9.13488e-25	0.145991	0.123435	1.18588	0.2581	-0.0985949	0.123435	-0.799887	0.441272	2.44258e-22	1	1
sucrose degradation III (sucrose invertase)	5.17154	0.0983421	52.6667	1.19952e-23	0.180297	0.139077	1.29853	0.214877	-0.136234	0.139077	-0.981053	0.34488	2.86068e-21	1	1
adenosylcobalamin salvage from cobinamide II	4.41491	0.0700485	63.2379	4.15234e-25	-0.0493115	0.0990636	-0.498866	0.62938	-0.0396319	0.0990636	-0.400019	0.693163	1.17749e-22	1	1
superpathway of 5-aminoimidazole ribonucleotide biosynthesis	5.21971	0.0798224	65.5557	1.57189e-25	0.188311	0.112886	1.673	0.117373	-0.0957476	0.112886	-0.849591	0.41549	4.83415e-23	1	1
palmitoleate biosynthesis I (from (5Z)-dodec-5-enoate)	3.82276	0.185236	20.6468	2.18739e-15	-0.565055	0.261963	-2.15778	0.0434513	0.26768	0.261963	1.02239	0.320323	3.57023e-13	1	1
galactose degradation I (Leloir pathway)	5.06376	0.0877888	57.797	1.94349e-24	0.130627	0.124152	1.05467	0.312736	-0.105577	0.124152	-0.851924	0.412614	4.98291e-22	1	1
purine nucleotides degradation II (aerobic)	3.50623	0.070902	49.5935	5.73811e-23	-0.113226	0.100271	-1.13148	0.283863	-0.0369466	0.100271	-0.367548	0.714284	1.30005e-20	1	1
peptidoglycan biosynthesis III (mycobacteria)	5.08902	0.0810225	62.9624	3.57696e-25	0.191936	0.114583	1.67975	0.115649	-0.106356	0.114583	-0.929778	0.373377	1.03036e-22	1	1
UDP-N-acetylmuramoyl-pentapeptide biosynthesis II (lysine-containing)	5.11236	0.0820219	62.475	4.13114e-25	0.189472	0.115996	1.63787	0.124159	-0.107692	0.115996	-0.929952	0.372918	1.17317e-22	1	1
UDP-N-acetylmuramoyl-pentapeptide biosynthesis I (meso-diaminopimelate containing)	5.10976	0.0809076	63.3086	3.18935e-25	0.192131	0.114421	1.68393	0.114886	-0.107914	0.114421	-0.94471	0.365911	9.32422e-23	1	1
superpathway of 2,3-butanediol biosynthesis	-2.32439	0.377492	-6.15889	4.26269e-06	0.479777	0.533855	0.899051	0.379956	-0.396017	0.533855	-0.742042	0.467326	0.000276865	1	1
Kdo transfer to lipid IVA III (Chlamydia)	2.87877	0.124022	23.2357	2.29238e-16	-0.20881	0.175394	-1.19118	0.25111	0.179351	0.175394	1.02436	0.3223	3.98906e-14	1	1
peptidoglycan biosynthesis V (&beta;-lactam resistance)	-3.24846	0.330892	-9.82053	2.81687e-09	1.33617	0.467952	2.85631	0.00966465	-0.0901854	0.467952	-0.192814	0.848653	2.60788e-07	1	1
8-amino-7-oxononanoate biosynthesis I	3.6329	0.155458	23.3839	1.84864e-16	-0.547597	0.219851	-2.49204	0.0217855	0.272152	0.219851	1.23878	0.231901	3.24142e-14	1	1
pyruvate fermentation to acetone	3.58367	0.122312	29.3322	2.0068e-18	0.386524	0.172975	2.23733	0.0380592	-0.162413	0.172975	-0.9395	0.362667	3.7935e-16	1	1
superpathway of Clostridium acetobutylicum acidogenic fermentation	1.44217	0.176695	8.16629	6.41001e-08	-0.392411	0.249884	-1.57098	0.132882	0.159119	0.249884	0.637592	0.532773	4.998e-06	1	1
guanosine nucleotides degradation III	3.52414	0.0917187	38.4896	8.46031e-21	0.070304	0.12971	0.543901	0.598853	-0.082549	0.12971	-0.636276	0.538293	1.7385e-18	1	1
adenine and adenosine salvage III	5.0652	0.0799465	63.5122	2.97723e-25	0.170306	0.113061	1.51065	0.154961	-0.0852118	0.113061	-0.754904	0.468714	8.75033e-23	1	1
superpathway of tetrahydrofolate biosynthesis	4.35646	0.0758221	57.6071	2.35931e-24	-0.0314371	0.107229	-0.292584	0.76223	-0.000940872	0.107229	-0.0079026	0.861884	6.00054e-22	1	1
superpathway of L-phenylalanine biosynthesis	-0.347246	0.363269	-0.956062	0.350595	-0.01801	0.51374	-0.03499	0.958638	-0.509742	0.51374	-0.992328	0.333045	1	1	1
superpathway of L-tryptophan biosynthesis	-11.0999	1.32177	-8.52717	3.88629e-07	1.92685	1.86927	1.01714	0.353321	3.6535	1.86927	1.94857	0.0733785	2.50265e-05	1	1
superpathway of L-tyrosine biosynthesis	-0.34798	0.363176	-0.95831	0.349489	-0.0180725	0.513608	-0.0351608	0.958036	-0.50923	0.513608	-0.991628	0.333391	1	1	1
queuosine biosynthesis	3.78332	0.0934823	40.5463	2.98928e-21	-0.221197	0.132204	-1.67553	0.114002	0.102001	0.132204	0.774158	0.455323	6.27617e-19	1	1
preQ0 biosynthesis	3.36313	0.0951403	35.4126	4.89802e-20	-0.257009	0.134549	-1.91293	0.0735858	0.0844021	0.134549	0.629277	0.542717	9.80567e-18	1	1
ubiquinol-8 biosynthesis (prokaryotic)	-0.608505	0.395447	-1.53926	0.139215	-1.12583	0.559247	-2.01343	0.0573746	0.124713	0.559247	0.223196	0.825753	1	1	1
starch degradation V	5.36357	0.0874319	61.4789	5.6813e-25	0.104581	0.123647	0.848215	0.414985	-0.0144423	0.123647	-0.116548	0.862069	1.57472e-22	1	1
CMP-legionaminate biosynthesis I	2.53304	0.172874	14.6605	1.86586e-12	-0.331224	0.244481	-1.35546	0.191824	0.230786	0.244481	0.944692	0.35804	2.47141e-10	1	1
isopropanol biosynthesis	-1.9081	1.11521	-1.74333	0.103488	-2.70602	1.57714	-1.71686	0.100951	-0.946162	1.57714	-0.610912	0.549161	1	1	1
thiazole biosynthesis II (Bacillus)	1.90345	0.115354	16.5212	2.11411e-13	0.366404	0.163135	2.2497	0.0375155	-0.0230014	0.163135	-0.139967	0.869901	3.03605e-11	1	1
thiazole biosynthesis I (E. coli)	3.71522	0.0981564	37.9166	1.18663e-20	-0.249011	0.138814	-1.79617	0.0911465	0.0888358	0.138814	0.641961	0.534149	2.42801e-18	1	1
superpathway of thiamin diphosphate biosynthesis II	3.08269	0.103618	29.7961	1.60861e-18	0.0374062	0.146538	0.256607	0.797539	0.0586047	0.146538	0.401811	0.695515	3.0551e-16	1	1
thiamin salvage II	4.19839	0.0744479	56.5574	3.79539e-24	-0.0756667	0.105285	-0.720442	0.49054	-0.0782765	0.105285	-0.744152	0.476444	9.42407e-22	1	1
superpathway of glucose and xylose degradation	3.94718	0.091476	43.2258	7.67849e-22	-0.31926	0.129367	-2.47145	0.0240587	0.14699	0.129367	1.13864	0.275907	1.66249e-19	1	1
TCA cycle V (2-oxoglutarate:ferredoxin oxidoreductase)	4.131	0.0970079	42.66	1.02095e-21	-0.114376	0.13719	-0.834127	0.420327	0.0619629	0.13719	0.453544	0.659755	2.19525e-19	1	1
glycerol degradation to butanol	0.810679	0.356704	2.27309	0.0338708	1.09545	0.504455	2.17191	0.0417312	-0.641025	0.504455	-1.27095	0.218265	0.982514	1	1
fatty acid salvage	-8.72713	0.419389	-20.9691	7.8266e-15	1.00495	0.593106	1.69909	0.122306	0.0515069	0.593106	0.084704	0.760464	1.18226e-12	1	1
pyruvate fermentation to isobutanol (engineered)	5.48941	0.0803287	68.5087	6.27538e-26	0.123626	0.113602	1.09159	0.298363	-0.0740165	0.113602	-0.652386	0.530365	2.02814e-23	1	1
pyrimidine deoxyribonucleotides de novo biosynthesis I	3.54562	0.0823797	43.1347	8.71396e-22	0.00994698	0.116502	0.0870534	0.86065	0.0398501	0.116502	0.344206	0.732264	1.87939e-19	1	1
pyrimidine deoxyribonucleotides de novo biosynthesis II	3.95665	0.0677221	58.611	1.77564e-24	0.139682	0.0957735	1.46541	0.171398	-0.0578753	0.0957735	-0.603596	0.563117	4.5566e-22	1	1
superpathway of pyrimidine ribonucleosides salvage	4.14362	0.0784572	52.9391	1.28311e-23	-0.00408999	0.110955	-0.035559	0.865606	0.0825058	0.110955	0.746815	0.474174	3.03058e-21	1	1
pyrimidine deoxyribonucleotide phosphorylation	3.37197	0.084353	40.0557	3.8989e-21	0.0557669	0.119293	0.469901	0.650027	0.0607326	0.119293	0.51179	0.621435	8.13032e-19	1	1
pyrimidine deoxyribonucleotides de novo biosynthesis IV	0.648517	0.363165	1.78598	0.0889274	-0.587612	0.513593	-1.14425	0.266	-0.62025	0.513593	-1.20772	0.241194	1	1	1
pyrimidine deoxyribonucleosides salvage	4.14131	0.0814323	50.9578	2.5866e-23	0.0484111	0.115163	0.422017	0.682978	0.0650945	0.115163	0.567147	0.584874	5.99947e-21	1	1
superpathway of pyrimidine deoxyribonucleoside salvage	3.54255	0.0807076	43.9895	5.71738e-22	0.0425323	0.114138	0.374873	0.714601	0.0524201	0.114138	0.461824	0.654572	1.24737e-19	1	1
superpathway of pyrimidine nucleobases salvage	5.28942	0.0786559	67.4199	8.79361e-26	0.189551	0.111236	1.70912	0.110296	-0.10478	0.111236	-0.943576	0.366966	2.80458e-23	1	1
pyrimidine deoxyribonucleotides biosynthesis from CTP	1.03501	0.34517	2.99905	0.00690122	-0.544491	0.488144	-1.11557	0.27785	-0.589815	0.488144	-1.20838	0.240919	0.251957	1	1
superpathway of pyrimidine deoxyribonucleotides de novo biosynthesis	2.38026	0.163776	14.5428	2.21738e-12	-0.330897	0.231614	-1.42925	0.169839	-0.0573334	0.231614	-0.247161	0.807787	2.9026e-10	1	1
adenosine ribonucleotides de novo biosynthesis	5.2981	0.0807566	65.7668	1.46158e-25	0.183482	0.114207	1.61111	0.13037	-0.101666	0.114207	-0.891648	0.392939	4.52473e-23	1	1
adenosine deoxyribonucleotides de novo biosynthesis II	4.9964	0.0758417	66.0363	1.27648e-25	-0.0902609	0.107256	-0.842194	0.42026	0.00453726	0.107256	0.0436353	0.859775	3.88922e-23	1	1
guanosine ribonucleotides de novo biosynthesis	5.14415	0.0764637	67.4577	9.0803e-26	0.160974	0.108136	1.49338	0.160396	-0.089727	0.108136	-0.831162	0.426427	2.89213e-23	1	1
guanosine deoxyribonucleotides de novo biosynthesis II	4.99642	0.0758334	66.0441	1.28375e-25	-0.0903625	0.107245	-0.843387	0.419599	0.00439879	0.107245	0.042321	0.859218	3.90534e-23	1	1
superpathway of guanosine nucleotides de novo biosynthesis I	3.96883	0.0810553	49.0729	6.03474e-23	-0.0259087	0.11463	-0.225096	0.80478	0.0905069	0.11463	0.792788	0.447361	1.36791e-20	1	1
superpathway of adenosine nucleotides de novo biosynthesis I	5.24142	0.0710212	74.022	1.37463e-26	0.0897615	0.100439	0.897485	0.393583	-0.0732011	0.100439	-0.72991	0.485526	4.51168e-24	1	1
inosine-5'-phosphate biosynthesis III	2.33831	0.268985	8.69485	2.18917e-08	0.505829	0.380403	1.33003	0.198693	-0.0624741	0.380403	-0.164213	0.871299	1.81146e-06	1	1
myo-, chiro- and scillo-inositol degradation	-0.638242	0.178168	-3.58396	0.00183583	0.152687	0.251967	0.606346	0.553201	0.534957	0.251967	2.1241	0.0468301	0.0816137	1	1
TCA cycle VII (acetate-producers)	-2.02209	0.2764	-7.31942	3.56975e-07	0.0619323	0.390889	0.158564	0.874131	-1.09239	0.390889	-2.79563	0.0111062	2.55906e-05	1	1
dTDP-N-acetylthomosamine biosynthesis	3.91014	0.128805	30.3842	9.34879e-19	0.380539	0.182158	2.0911	0.0507472	-0.283413	0.182158	-1.55727	0.137654	1.79292e-16	1	1
superpathway of GDP-mannose-derived O-antigen building blocks biosynthesis	3.8727	0.0844495	45.9629	2.38809e-22	0.0024906	0.11943	0.0220445	0.874464	0.0592395	0.11943	0.498441	0.630051	5.28166e-20	1	1
1,4-dihydroxy-6-naphthoate biosynthesis I	-1.56742	0.566539	-2.78629	0.0126135	0.233255	0.801207	0.293381	0.772364	-1.8936	0.801207	-2.37043	0.0279117	0.432474	1	1
cob(II)yrinate a,c-diamide biosynthesis I (early cobalt insertion)	0.372716	0.710555	0.524841	0.605339	-1.06405	1.00488	-1.05869	0.301972	-1.11649	1.00488	-1.11158	0.279211	1	1	1
L-arginine biosynthesis IV (archaebacteria)	4.93439	0.0885628	55.8319	4.08577e-24	0.171932	0.125247	1.37608	0.191399	-0.136008	0.125247	-1.08763	0.297602	1.01703e-21	1	1
aromatic biogenic amine degradation (bacteria)	-3.6544	0.362429	-10.086	1.75789e-09	1.13275	0.512552	2.21059	0.0388455	-0.211988	0.512552	-0.413498	0.684601	1.67529e-07	1	1
mannan degradation	2.44893	0.121499	20.176	3.87957e-15	-0.256072	0.171826	-1.49154	0.154545	0.132263	0.171826	0.77102	0.453984	6.18514e-13	1	1
6-hydroxymethyl-dihydropterin diphosphate biosynthesis III (Chlamydia)	4.40487	0.0790425	55.8765	4.66069e-24	-0.192671	0.111783	-1.72728	0.106046	0.0312546	0.111783	0.281174	0.771239	1.14817e-21	1	1
methylerythritol phosphate pathway II	5.17482	0.0848091	61.1579	6.44264e-25	0.159206	0.119938	1.33104	0.206608	-0.0944779	0.119938	-0.78895	0.447911	1.7646e-22	1	1
gondoate biosynthesis (anaerobic)	5.42673	0.078448	69.3578	5.02538e-26	0.131866	0.110942	1.19257	0.257678	-0.058546	0.110942	-0.528247	0.610412	1.6333e-23	1	1
oleate biosynthesis IV (anaerobic)	3.96132	0.17763	22.3119	4.62327e-16	-0.538776	0.251206	-2.14557	0.0446086	0.247708	0.251206	0.986639	0.337291	7.89331e-14	1	1
superpathway of purine nucleotides de novo biosynthesis I	4.41008	0.0697908	63.3782	3.43555e-25	0.0177843	0.0986991	0.182534	0.811565	0.0416955	0.0986991	0.425423	0.67685	9.71209e-23	1	1
mevalonate pathway I	-1.70182	0.517746	-3.28737	0.00353813	1.3034	0.732203	1.78041	0.0898336	-0.494332	0.732203	-0.675236	0.507346	0.14529	1	1
superpathway of L-alanine biosynthesis	0.258121	0.257183	1.00387	0.327993	0.238074	0.363712	0.654782	0.520859	-0.302101	0.363712	-0.830687	0.416659	1	1	1
ADP-L-glycero-&beta;-D-manno-heptose biosynthesis	-0.390463	0.239072	-1.63402	0.118325	0.218553	0.3381	0.646788	0.526068	-0.856232	0.3381	-2.5335	0.0196856	1	1	1
anhydromuropeptides recycling	1.84449	0.391204	4.71559	0.000119298	-1.29496	0.553246	-2.34091	0.0293401	-0.164312	0.553246	-0.296983	0.769625	0.00670024	1	1
purine ribonucleosides degradation	4.75036	0.0963293	49.3931	4.63278e-23	0.178858	0.13623	1.31524	0.209642	-0.128458	0.13623	-0.944403	0.363138	1.05744e-20	1	1
superpathway of purine deoxyribonucleosides degradation	4.19311	0.0825299	50.9097	2.67003e-23	-0.0283961	0.116715	-0.243634	0.796735	-0.168645	0.116715	-1.4476	0.171125	6.20868e-21	1	1
superpathway of pyrimidine deoxyribonucleosides degradation	4.25454	0.0884352	48.1971	8.00212e-23	0.0222386	0.125066	0.178115	0.835244	-0.180426	0.125066	-1.44509	0.170753	1.79354e-20	1	1
CDP-diacylglycerol biosynthesis II	5.3247	0.0849156	62.8425	3.53375e-25	0.195592	0.120089	1.63277	0.12475	-0.126931	0.120089	-1.05881	0.311154	1.01973e-22	1	1
polymyxin resistance	-0.532842	0.696918	-0.771866	0.450192	0.237689	0.985591	0.243439	0.810152	-2.3825	0.985591	-2.42752	0.024887	1	1	1
superpathway of heme biosynthesis from uroporphyrinogen-III	-0.693477	0.204439	-3.39439	0.00286128	-0.779184	0.289121	-2.69629	0.0139237	-0.400332	0.289121	-1.38516	0.182335	0.120438	1	1
tRNA processing	1.22201	0.173591	7.0434	6.42962e-07	0.124338	0.245494	0.506985	0.619345	0.14978	0.245494	0.611021	0.550042	4.45992e-05	1	1
methylphosphonate degradation I	-9.05515	0.518501	-17.6753	9.44528e-13	-0.594081	0.733271	-0.813865	0.454433	1.47356	0.733271	2.02456	0.0680294	1.13534e-10	1	1
peptidoglycan maturation (meso-diaminopimelate containing)	5.11881	0.111905	45.7973	2.05612e-22	0.306698	0.158258	1.94039	0.0688519	-0.21808	0.158258	-1.37964	0.187171	4.52876e-20	1	1
superpathway of pyrimidine ribonucleotides de novo biosynthesis	4.3946	0.0713419	61.7748	5.70301e-25	0.0192758	0.100893	0.193449	0.81043	0.0474356	0.100893	0.473341	0.647058	1.55505e-22	1	1
superpathway of pyrimidine deoxyribonucleotides de novo biosynthesis (E. coli)	3.9179	0.0689166	57.0196	3.02855e-24	0.121921	0.0974628	1.25682	0.237207	-0.049589	0.0974628	-0.507943	0.623327	7.57628e-22	1	1
allantoin degradation IV (anaerobic)	-10.3997	0.940275	-11.523	1.05375e-07	1.35943	1.32975	1.04174	0.338576	-0.15653	1.32975	-0.0677381	0.666185	6.88436e-06	1	1
aspartate superpathway	2.6024	0.139177	18.713	1.65805e-14	-0.00897843	0.196827	-0.0453942	0.917428	-0.0301758	0.196827	-0.152654	0.871763	2.54944e-12	1	1
superpathway of pyridoxal 5'-phosphate biosynthesis and salvage	2.64663	0.122824	21.5687	1.0026e-15	-0.144609	0.1737	-0.832629	0.418806	0.133592	0.1737	0.770437	0.454113	1.67831e-13	1	1
(5Z)-dodec-5-enoate biosynthesis	3.80095	0.183536	20.7192	2.04201e-15	-0.557527	0.259559	-2.14877	0.0442518	0.262577	0.259559	1.01219	0.325061	3.35176e-13	1	1
phosphatidylglycerol biosynthesis I (plastidic)	5.1295	0.0883142	58.1974	1.65956e-24	0.205873	0.124895	1.65198	0.120039	-0.14835	0.124895	-1.18977	0.255927	4.28712e-22	1	1
phosphatidylglycerol biosynthesis II (non-plastidic)	5.12943	0.0883077	58.2023	1.67112e-24	0.205896	0.124886	1.65237	0.119937	-0.148476	0.124886	-1.19091	0.255423	4.31289e-22	1	1
mycolate biosynthesis	3.98901	0.176636	22.5945	3.59705e-16	-0.537811	0.249801	-2.1538	0.0438589	0.248441	0.249801	0.995131	0.333284	6.20269e-14	1	1
NAD salvage pathway I	4.87456	0.0879293	55.5527	4.56317e-24	0.130072	0.124351	1.04868	0.315529	-0.0833986	0.124351	-0.671552	0.517059	1.12569e-21	1	1
NAD biosynthesis I (from aspartate)	4.35529	0.0684261	63.8728	3.5369e-25	-0.070962	0.0967691	-0.734642	0.48362	-0.0252366	0.0967691	-0.259633	0.776819	1.01446e-22	1	1
pyridoxal 5'-phosphate biosynthesis I	2.23046	0.125712	17.7587	4.7706e-14	-0.195028	0.177784	-1.09738	0.289055	0.160511	0.177784	0.904268	0.380801	7.13965e-12	1	1
TCA cycle VIII (helicobacter)	1.2776	0.141224	9.0537	1.22621e-08	0.156533	0.19972	0.784612	0.445184	0.0958188	0.19972	0.480134	0.638785	1.04747e-06	1	1
flavin biosynthesis I (bacteria and plants)	4.35603	0.0669341	65.3278	2.33543e-25	-0.211603	0.0946591	-2.24267	0.0414368	0.0396034	0.0946591	0.4219	0.679097	6.87698e-23	1	1
formaldehyde oxidation I	0.719259	0.152527	4.71834	0.000125443	0.346118	0.215706	1.6055	0.125751	0.271943	0.215706	1.26124	0.224012	0.00696543	1	1
adenosine nucleotides degradation II	3.40554	0.0975735	34.9572	5.95921e-20	0.0969225	0.13799	0.704257	0.495993	-0.100908	0.13799	-0.731342	0.479041	1.18872e-17	1	1
superpathway of L-serine and glycine biosynthesis I	5.11246	0.0894767	57.2506	2.37074e-24	0.183702	0.126539	1.45504	0.168064	-0.108172	0.126539	-0.856128	0.409925	6.02991e-22	1	1
sulfate reduction I (assimilatory)	1.19999	0.141368	8.49536	3.53373e-08	0.0664147	0.199925	0.332621	0.74457	0.25318	0.199925	1.26807	0.222567	2.84639e-06	1	1
superpathway of sulfate assimilation and cysteine biosynthesis	2.2348	0.131443	17.0177	1.11353e-13	0.0641197	0.185889	0.345344	0.735631	0.224835	0.185889	1.21129	0.243709	1.63322e-11	1	1
TCA cycle I (prokaryotic)	3.67056	0.109685	33.5124	1.39321e-19	0.00966524	0.155118	0.0633377	0.895176	-0.0122823	0.155118	-0.0782271	0.892969	2.74351e-17	1	1
superpathway of glyoxylate bypass and TCA	-7.88286	0.508763	-15.528	8.23696e-13	1.18014	0.719499	1.64099	0.12464	1.16269	0.719499	1.61743	0.12986	1.11757e-10	1	1
teichoic acid (poly-glycerol) biosynthesis	0.213297	0.169949	1.25564	0.225467	0.594495	0.240344	2.47513	0.0226496	0.13694	0.240344	0.570353	0.576663	1	1	1
superpathway of thiamin diphosphate biosynthesis I	3.64597	0.100448	36.356	2.72495e-20	-0.202312	0.142055	-1.42567	0.174363	0.120784	0.142055	0.852653	0.410568	5.5096e-18	1	1
superpathway of L-threonine biosynthesis	5.17516	0.079221	65.4933	1.64152e-25	0.145487	0.112035	1.30266	0.217436	-0.0780928	0.112035	-0.697919	0.502518	5.03503e-23	1	1
tRNA charging	5.10354	0.0809543	63.1966	3.32422e-25	0.189327	0.114487	1.65848	0.120142	-0.10382	0.114487	-0.908315	0.384187	9.66887e-23	1	1
L-tryptophan biosynthesis	4.88938	0.0886228	55.2852	5.05371e-24	0.069128	0.125332	0.553226	0.592982	-0.0642944	0.125332	-0.513598	0.619153	1.2382e-21	1	1
L-tyrosine degradation I	-10.3899	0.638034	-17.5237	1.03459e-08	-1.0345	0.902317	-1.12062	0.336126	-0.128509	0.902317	-0.171391	0.68493	7.07911e-07	1	1
superpathway of ubiquinol-8 biosynthesis (prokaryotic)	-0.62988	0.399525	-1.577	0.130255	-1.14684	0.565014	-2.03002	0.0555372	0.141774	0.565014	0.251076	0.804427	1	1	1
L-valine biosynthesis	5.38602	0.081923	65.9034	1.38375e-25	0.160201	0.115857	1.38668	0.189508	-0.0903244	0.115857	-0.78081	0.453225	4.30417e-23	1	1
