# Supplementary figures and images for: Altered mouse cecal microbiome-serum enterolignans relationships in response to dietary lignans ingested through whole flaxseed or flaxseed hull
Source: Royal Society of Chemistry journal article supplement (doi:10.1039/d5fo03558a), 2025-11-18

Figure S1

Significant Taxa-SCFA Correlations Shared Among Diets

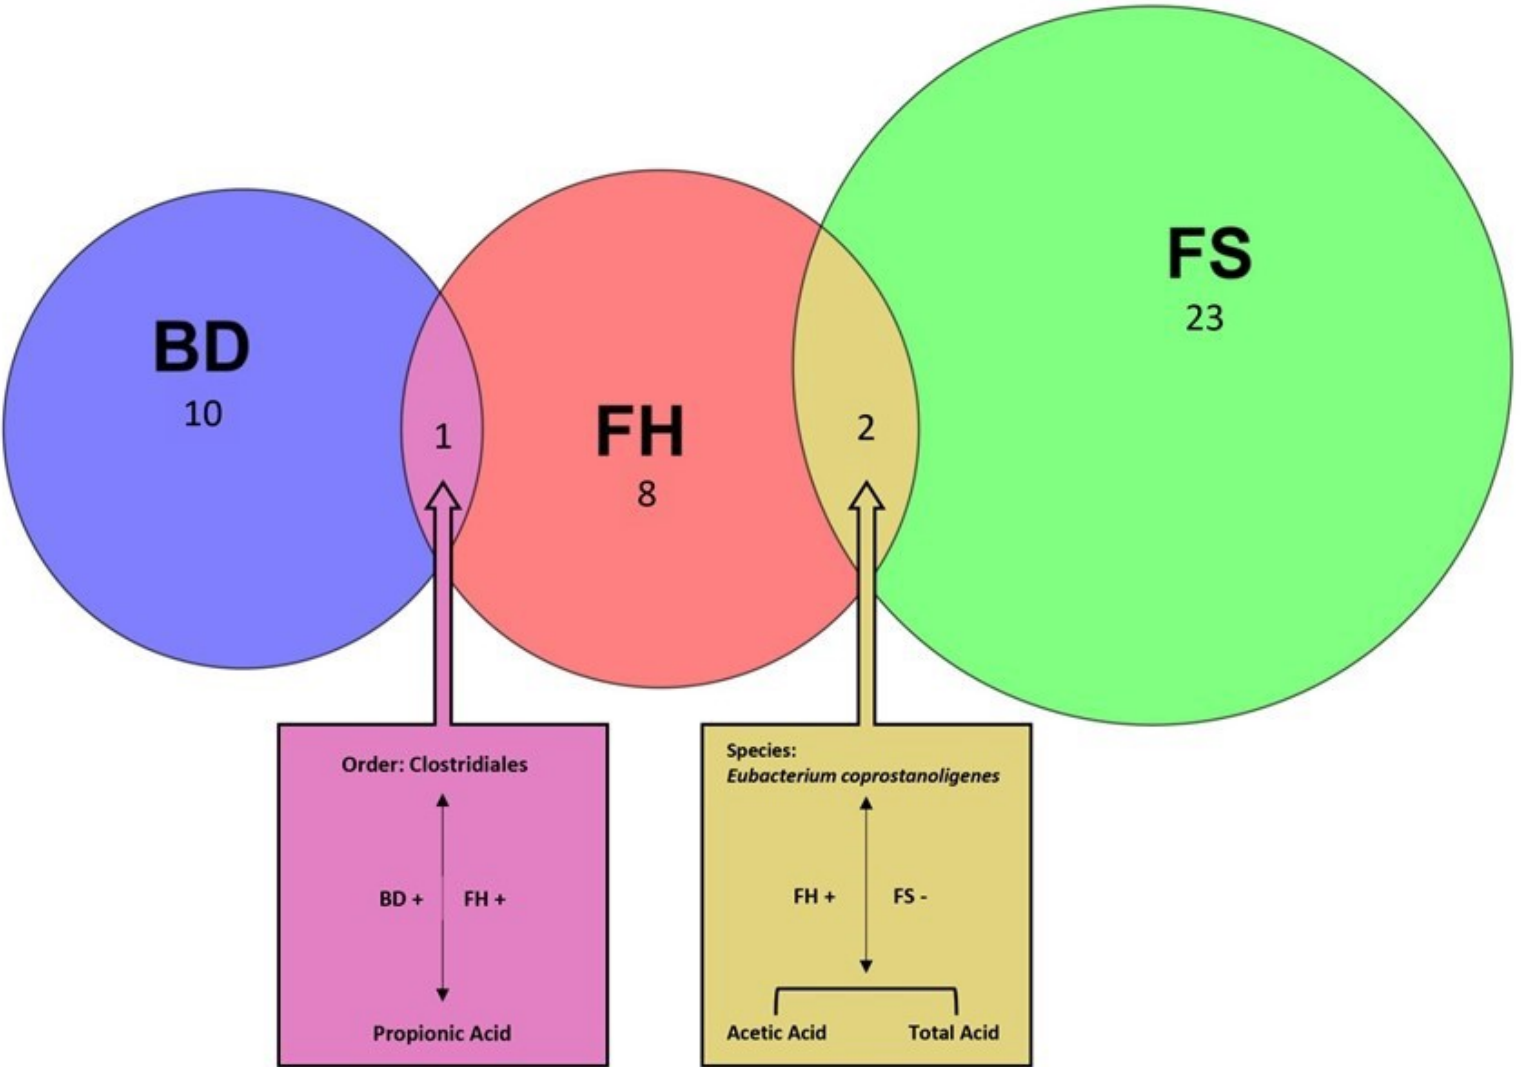

Supplement: d5fo03558a2.pdf [file d5fo03558a2.pdf]

Figure S2

Significant Taxa-Lignan Correlations Shared Among Diets

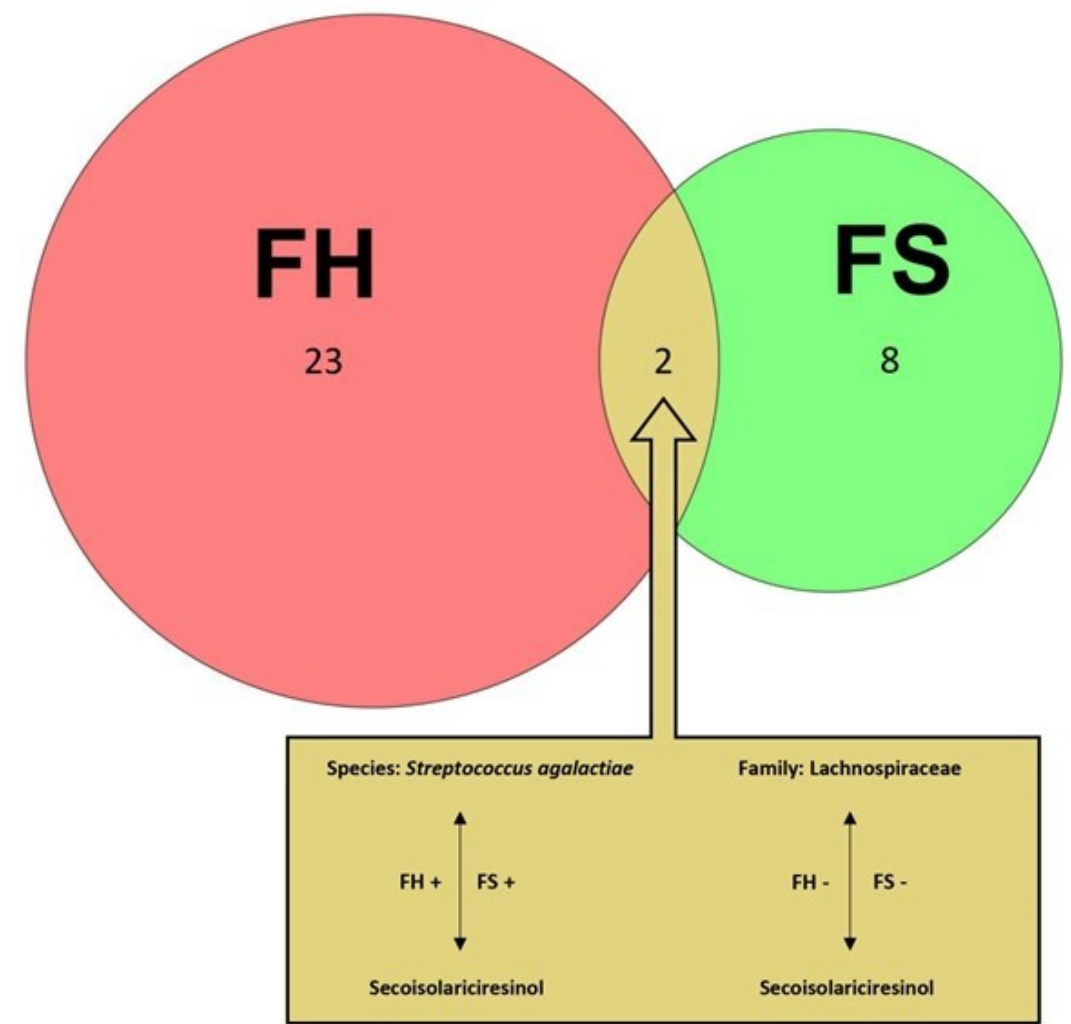

Supplement: d5fo03558a3.pdf [file d5fo03558a3.pdf]
